# Supplementary material for: The global distribution of the M1 ocean tide
Source: Copernicus journal article supplement (doi:10.5194/os-15-431-2019), 2019-04-16
Supplement: Supplementary file 1 [file os-15-431-2019-supplement.zip]

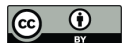

## *Supplement of*

# **The global distribution of the M1 ocean tide**

**Philip L. Woodworth**

*Correspondence to:* Philip L. Woodworth (plw@noc.ac.uk)

- os-15-431-2019-supplement-title-page.pdf
- M1prime\_and\_M1\_values
- m1\_supp\_mat\_v2.pdf

The copyright of individual parts of the supplement might differ from the CC BY 4.0 License.
